1 **Dominance rank-associated immune gene expression is widespread, sex-specific, and a**  
2 **precursor to high social status in wild male baboons**

3  
4 Amanda J. Lea<sup>1,§,\*</sup>, Mercy Y. Akinyi<sup>1,2</sup>, Ruth Nyakundi<sup>2</sup>, Peter Mareri<sup>2</sup>, Fred Nyundo<sup>2</sup>,  
5 Thomas Kariuki<sup>2</sup>, Susan C. Alberts<sup>1,2,3</sup>, Elizabeth A. Archie<sup>4</sup>, Jenny Tung<sup>1,2,3,5,\*</sup>  
6

7 <sup>1</sup>Department of Biology, Duke University, Box 90338, Durham, NC 27708, USA

8 <sup>2</sup>Institute of Primate Research, National Museums of Kenya, P. O. Box 24481, Karen 00502,  
9 Nairobi, Kenya

10 <sup>3</sup>Department of Evolutionary Anthropology, Box 90383, Durham, NC 27708, USA

11 <sup>4</sup>Department of Biological Sciences, University of Notre Dame, Notre Dame, Indiana 46556,  
12 USA

13 <sup>5</sup>Duke University Population Research Institute, Box 90420, Durham, NC 27708, USA

14 <sup>§</sup>Present address: Lewis-Sigler Institute for Integrative Genomics, Carl Icahn Laboratory,  
15 Washington Road, Princeton University, Princeton, NJ 08544, USA

16 \*Corresponding authors' email: [jt5@duke.edu](mailto:jt5@duke.edu), [amandalea7180@gmail.com](mailto:amandalea7180@gmail.com)

17

18 Classification: Biological sciences, Anthropology

19 Short title: Sex-specific links between social status and gene regulation

20 Keywords: dominance hierarchy, social behavior, sociogenomics, expression quantitative trait  
21 loci, lipopolysaccharide, Mendelian randomization  
22

23 **ABSTRACT**

24           In humans and other hierarchical species, social status is tightly linked to variation in  
25 health and fitness-related traits. Experimental manipulations of social status in female rhesus  
26 macaques suggest that this relationship is partially explained by status effects on immune gene  
27 regulation. However, social hierarchies are established and maintained in different ways across  
28 species: while some are based on kin-directed nepotism, others emerge from direct physical  
29 competition. We investigated how this variation influences the relationship between social status  
30 and immune gene regulation in wild baboons, where hierarchies in males are based on fighting  
31 ability but female hierarchies are nepotistic. We measured rank-related variation in gene  
32 expression levels in adult baboons of both sexes at baseline and in response to *ex vivo*  
33 stimulation with the bacterial endotoxin lipopolysaccharide (LPS). We identified >2000 rank-  
34 associated genes in males, an order of magnitude more than in females. In males, high status  
35 predicted increased expression of genes involved in innate immunity and preferential activation  
36 of the NFkB-mediated pro-inflammatory pathway, a pattern previously associated with low  
37 status in female rhesus macaques. Using Mendelian randomization, we reconcile these  
38 observations by demonstrating that high status-associated gene expression patterns are  
39 precursors, not consequences, of high social status in males, in support of the idea that  
40 physiological condition determines who attains high rank. Together, our work provides the first  
41 test of the relationship between social status and immune gene regulation in wild primates. It also  
42 emphasizes the importance of social context in shaping the relationship between social status and  
43 immune function.

44

45 **SIGNIFICANCE**

46 Social status predicts fitness outcomes in social animals, motivating efforts to understand  
47 its physiological causes and consequences. We investigated the relationship between social status  
48 and immune gene expression in wild baboons, where female status is determined by kinship but  
49 male status is determined by fighting ability. We uncover pervasive status-gene expression  
50 associations in males, but not females. High status males exhibit high levels of pro-inflammatory  
51 gene expression, in contrast to previous findings in hierarchies that are not competitively  
52 determined. Using Mendelian randomization, we show that this status-associated variation  
53 precedes dominance rank attainment: males who compete successfully for high status are already  
54 immunologically distinct. The nature of social hierarchies thus fundamentally shapes the  
55 relationship between social status and immune function.

## 56 INTRODUCTION

57 Many mammalian societies are characterized by strict dominance hierarchies, in which  
58 consistent, asymmetric agonistic relationships exist between group members. In such species,  
59 position in the social hierarchy (i.e., dominance rank) often predicts physiological outcomes,  
60 such as steroid hormone levels and immune function, and components of fitness, including  
61 fertility and survival rates (1–4). Notably, the relationship between social status, health, and  
62 components of fitness is especially robust in humans (5). Across human populations,  
63 socioeconomic status (SES) has been consistently associated with variation in mortality rates (6–  
64 8), and expected lifespan can differ between the highest and lowest status individuals by a  
65 decade or more (6). While human SES has no exact equivalent in animals, dominance rank in  
66 social mammals is arguably the closest parallel (2, 4). Thus, studies of rank-related gradients are  
67 important not only for understanding the evolution of social behavior in general, but also for  
68 understanding the causes and consequences of social inequality in our own species.

69 The molecular signature of social status is of particular interest because it can help  
70 address the long-standing puzzle of how social gradients ‘get under the skin’ (9). Advances in  
71 this area have primarily come from a few systems (10): observational studies in humans, which  
72 have established consistent, correlative relationships between social status and gene regulation  
73 (11); models of social defeat in laboratory rodents, which have connected socially induced stress  
74 to specific neural and endocrine signaling pathways (12, 13); and experimental manipulations of  
75 dominance rank in captive rhesus macaques, which have demonstrated causal effects of social  
76 status on gene regulation under controlled conditions (14, 15). For example, by manipulating  
77 dominance rank in replicate social groups of female rhesus macaques, Snyder-Mackler et al. (14)  
78 demonstrated that low social status leads to constitutive up-regulation of genes involved in innate

79 immune defense and inflammation. Low status females responded more strongly to *ex vivo*  
80 antigen stimulation and preferentially activated an NFkB-mediated pro-inflammatory response  
81 pathway in favor of an alternative, type I interferon-mediated pathway. Studies in humans have  
82 also correlated low SES and other sources of social adversity with up-regulation of pro-  
83 inflammatory genes and down-regulation of genes involved in the type I interferon response  
84 (11), suggesting that the transcriptional response to social adversity is conserved across species  
85 (16). Because chronic inflammation is a hallmark of aging and disease risk (17), this response  
86 has in turn been hypothesized to mediate social status gradients in health and disease  
87 susceptibility (16).

88         Such studies suggest that social status effects on health and fitness are mediated, at least  
89 in part, through changes in gene regulation in the immune system. However, the relationship  
90 between social status and gene regulation remains unexplored in natural populations, even  
91 though the behavioral, physiological, and fitness correlates of social status have been extensively  
92 investigated in such populations (2, 4, 18, 19). Addressing this gap is important for two reasons.  
93 First, with the exception of humans, the extent to which social status-gene regulation  
94 associations arise under non-experimental conditions is unknown, leaving open the question of  
95 whether and how they contribute to social status-fitness effects in the wild. Second, social  
96 hierarchies vary in how they are established, enforced, and maintained (2, 3, 18), and laboratory  
97 systems capture only a narrow spectrum of this variation. For example, female rhesus  
98 macaques—one of the most important models for studying social hierarchies in the lab (20)—  
99 exhibit some of the most inequitable social relationships in their genus (21). Such variation  
100 influences the effects of social status on HPA axis physiology (22) and is likely to influence its  
101 molecular signature as well.

102           Indeed, at least two distinct types of hierarchies are found in social mammals: (i) those  
103 based on individual competitive ability, where the main predictors of rank are age, strength,  
104 and/or body size (e.g., male olive baboons (23), male red deer (24), female African elephants  
105 (25)) and (ii) ‘nepotistic’ hierarchies, in which individuals acquire predictable and stable  
106 dominance ranks similar to those of their kin, typically because relatives support one another in  
107 agonistic encounters (26). Nepotistic hierarchies occur most often in female social mammals,  
108 especially species in which females do not disperse (e.g., Japanese macaques (27), yellow  
109 baboons (28), spotted hyenas (29)). However, nepotistic hierarchies and competitive ability-  
110 based hierarchies can co-exist in the same species due to either sex or population differences. For  
111 example, male yellow baboons compete for rank via direct physical competition, such that the  
112 highest ranking males are usually prime-age males in excellent body condition (23). In contrast,  
113 for female yellow baboons, rank is matrilineally ‘inherited’, such that adult females tend to rank  
114 immediately below their mother (28). Contrasting hierarchy types exist between sexes and  
115 populations in humans as well: in small-scale human foraging societies, male status is often  
116 based on hunting ability (30, 31), while in 19<sup>th</sup> century Finnish and Mormon populations kinship  
117 ties strongly predicted female and male social status, respectively (32, 33).

118           Here, we use behavioral and genomic data from a long-term study population of wild  
119 yellow baboons in Kenya (34) to investigate the relationship between social status, gene  
120 expression, and immune function in two different types of status hierarchies: the highly dynamic,  
121 competitive ability-based hierarchy in males and the relatively stable, nepotism-based hierarchy  
122 in females. Baboons are an excellent system for studying rank effects because rank dynamics are  
123 well-characterized, and rank itself predicts a number of fitness-related traits (23, 35, 36). Further,

124 differences in rank attainment and maintenance between the sexes provide a natural contrast  
125 between dominance hierarchy types.

126 We set out to address three major questions: (i) Is social status associated with  
127 predictable patterns of gene expression in wild baboons and, if so, which genes and biological  
128 processes are affected? (ii) To what degree does the social status-gene regulation relationship  
129 depend on sex-specific social hierarchies? and (iii) In the competitive ability-based hierarchy  
130 characteristic of males, is variation in gene expression a consequence of male rank, or instead,  
131 does variation in gene expression precede variation in male rank (i.e., because it is a component  
132 of male quality or condition)? To do so, we measured cell type composition, genome-wide gene  
133 expression levels, genetic variation, and cytokine levels in blood collected from 61 known  
134 individuals (n=26 adult females and 35 adult males). We used an experimental *ex vivo* approach  
135 in which paired samples of cells were incubated in either the presence or absence of  
136 lipopolysaccharide (LPS: a component of Gram-negative bacterial cell membranes; Figure 1).  
137 LPS is a powerful stimulant of the Toll-like receptor 4 (TLR4)-mediated innate immune  
138 response, which has previously been shown to be sensitive to social environmental conditions (4,  
139 11, 14). We investigated sex-specific associations between gene expression and dominance rank,  
140 and used Mendelian randomization (MR) to test for causal connections between social status and  
141 innate immune gene expression in males (37). Together, our findings expand work on the  
142 functional genomic signature of social status to wild primates and highlight its dependency on  
143 sex and/or hierarchy type. In addition, our MR analyses illustrate one way in which gene  
144 regulatory variation can be harnessed to address long-standing questions in behavioral and  
145 evolutionary ecology: in this case, about the causal relationship between dominance rank and  
146 immune function in competitive hierarchies.

147

## 148 **RESULTS**

### 149 *Ex vivo stimulation with lipopolysaccharide (LPS) induces a strong immune response*

150 To confirm the efficacy of the LPS challenge, we measured 15 immune-related cytokines  
151 in serum collected from stimulated (LPS condition) and unstimulated (NULL condition) cells for  
152 a subset of individuals in our dataset (n=11 females, 18 males; Figure S1 and Table S1). As  
153 expected, cytokines involved in inflammatory signaling, such as IL1B (linear mixed model:  
154  $p=5.41 \times 10^{-5}$ ), IL6 ( $p=2.62 \times 10^{-19}$ ), and TNF $\alpha$  ( $p=6.51 \times 10^{-11}$ ), were strongly up-regulated in cells  
155 exposed to LPS compared to unstimulated samples from the same study subjects (Figure 1).  
156 Principal component analysis (PCA) of the full gene expression dataset (n=121 samples from 61  
157 individuals) revealed that treatment condition was the largest source of variance in  
158 transcriptional profiles (Table S2 and Figures S2-S3). Specifically, LPS and NULL condition  
159 samples separated perfectly on PC1 (Spearman's rank correlation,  $\rho=0.974$ ,  $p < 10^{-16}$ ; Figure 2).  
160 Overall, 67% of the 7576 genes analyzed were differentially expressed between treatment  
161 conditions (linear mixed effects model, FDR<1%), and genes up-regulated in the LPS treatment  
162 condition were strongly enriched for innate immune response-related pathways (Figure S4 and  
163 Table S3; hypergeometric test, all FDR< $10^{-6}$ ).

164

### 165 *Rank-gene expression associations are highly sex-specific*

166 PCA including both NULL and LPS condition samples revealed a highly sex-specific  
167 signal of social status in baboon gene expression profiles. Dominance rank was significantly  
168 associated with PC2 of the gene expression data set in males ( $\rho=0.44$ ,  $p=1.26 \times 10^{-4}$ ), but  
169 showed no such association in females, either on PC2 ( $\rho=-0.11$ ,  $p=0.42$ ; Figure 2) or in any of



170 the top 20 PCs (all  $p > 0.05$ ). At the level of individual genes, 2277 and 25 genes were associated  
171 with rank in males and females, respectively, and 1584 genes exhibited significant rank x sex  
172 interactions (FDR < 5%; Figure S5 and Table S4). Sex differences in rank-gene expression  
173 associations were not primarily driven by differences in power: across 100 subsampled data sets  
174 with matched numbers of males and females, we consistently found far more rank-associated  
175 genes in males than in females (the difference in the number of genes associated with rank in  
176 males compared to females was  $1387 \pm 819.09$  s.d.; Figure S6). Further, male and female rank  
177 effects were weakly correlated overall (Figure S5;  $\rho = 0.045$ ,  $p < 10^{-10}$ ), and only 4 genes were  
178 associated with rank in both sexes, no more than expected by chance (hypergeometric test:  
179  $p = 0.06$ ).

180 Social status has been shown to influence not only steady-state gene expression levels,  
181 but also the response to immune stimulation (14, 38). Such a pattern suggests that the gene  
182 regulatory signatures of social interactions can be concealed or unmasked by other  
183 environmental factors: in female rhesus macaques, for example, dominance rank effects are  
184 magnified after LPS stimulation, because low ranking females mount stronger inflammatory  
185 responses than high ranking females (14). In contrast, in male baboons, we found relatively few  
186 genes with statistical support for a rank x treatment interaction ( $n = 5$  genes, FDR < 5%) or for a  
187 rank effect on the fold change in expression levels between LPS and NULL condition cells  
188 ( $n = 12$  genes, FDR < 5%). This result in part reflects low power to detect significant interactions  
189 when considering only males (Figure S7). Indeed, we observed strong evidence for male rank x  
190 condition interactions for key innate immune genes such as *IFI6* ( $q = 0.021$ ,  $p = 9.57 \times 10^{-6}$ ),  
191 *TMEM173* ( $q = 0.042$ ,  $p = 3.79 \times 10^{-4}$ ), and *IRF9* ( $q = 0.047$ ,  $p = 7.54 \times 10^{-4}$ ), all of which exhibited  
192 stronger responses to LPS stimulation in low ranking males relative to high ranking males.

193 Overall, however, social status effects on gene regulation were largely consistent between LPS  
194 and NULL conditions ( $\rho=0.619$ ,  $p<10^{-10}$ ; Figure S7).

195

196 *High status predicts higher expression of innate immune genes in males*

197 We next explored the biological function of male rank-associated genes, after filtering for  
198 genes that were up-regulated in the LPS condition (i.e., those specifically implicated in the innate  
199 immune response). Among genes up-regulated in high status males ( $n=478$  genes;  $FDR<5\%$ ), we  
200 identified significant enrichment for GO terms related to the defense response, such as  
201 ‘regulation of IL6 production’ ( $p=2.2\times 10^{-7}$ ), ‘toll-like receptor signaling pathway’ ( $p=9.2\times 10^{-7}$ ),  
202 and ‘regulation of inflammatory response’ ( $p=2.0\times 10^{-8}$ ; all tests were performed relative to the  
203 background set of genes up-regulated in the LPS condition; see Figure 2, and Table S5). In  
204 contrast, genes up-regulated in low status males ( $n=374$  genes), were enriched for GO categories  
205 related to basic cellular function and RNA processing (Figure 3 and Table S6).

206 These results were surprising given that work in captive female macaques (14, 15) and  
207 humans (39, 40) has consistently associated low, not high, social status with pro-inflammatory  
208 gene expression. Indeed, when we compared our estimates of rank effects on gene expression  
209 levels with those from captive female macaques collected using a similar method (14), genes that  
210 were more highly expressed in high status male baboons tended to be more highly expressed in  
211 low status female macaques (LPS:  $\rho=0.222$ ,  $p=2.98\times 10^{-15}$ ,  $n=1224$  genes significantly  
212 associated with rank in both datasets; NULL:  $\rho=-0.244$ ,  $p=1.80\times 10^{-7}$ ,  $n=892$  genes; Figure 3  
213 and Figure S8). Further, the number of genes that displayed directionally opposite rank effects in  
214 the two data sets was significantly greater than chance expectations (binomial test, LPS:  
215  $p=1.196\times 10^{-8}$ , NULL:  $p=8.11\times 10^{-7}$ ).

216 We also observed reversal of social status effects for genes specifically involved in  
217 signaling through TLR4, the cell surface receptor for LPS. When activated, TLR4 signals  
218 through two alternative pathways: a MyD88-dependent pro-inflammatory pathway that drives an  
219 NFkB-associated transcriptional program, or a TRIF-dependent pathway that drives type I  
220 interferon regulatory activity (41). In captive rhesus macaque females, genes involved in the  
221 MyD88-dependent response are up-regulated in low status animals, consistent with social  
222 subordination-driven pro-inflammatory activity (14). In contrast, in our data set, MyD88-  
223 dependent genes tended to be more highly expressed in high status males (Fisher's exact test,  
224 odds=1.41,  $p=1.22 \times 10^{-3}$ ). Indeed, MyD88-dependent genes exhibited a stronger bias towards  
225 higher expression in high-ranking animals than either genes involved in the TRIF-dependent  
226 antigen response (Wilcoxon rank sum test:  $p=5.34 \times 10^{-3}$ ) or the full set of genes analyzed  
227 ( $p=5.36 \times 10^{-12}$ ; Figure 3). As a result, male dominance rank strongly predicted median gene  
228 expression levels across all rank-associated MyD88-dependent genes ( $\rho=-0.414$ ,  $p=0.012$ ; no  
229 rank-related pattern is observable for TRIF-dependent genes:  $\rho=-0.133$ ,  $p=0.441$ ; Figure 3).

230  
231 *Mendelian randomization analysis indicates that the gene expression signature of high status*  
232 *precedes attainment of high rank*

233 Our results reveal a widespread signature of male social status in leukocyte gene  
234 expression. In contrast to experimental studies in captive animal models, however, the direction  
235 of the causal arrow connecting social status to gene expression here is unclear (18, 19, 35, 36, 42,  
236 43). In natural populations, correlates of dominance rank can arise because being high (or low)  
237 ranking causally alters an animal's physiology. Alternatively, in competitive ability-based  
238 hierarchies, hormonal, immunological, or other physiological correlates of rank could be

239 indicators of condition or quality, which in turn are causal to an animal's ability to achieve high  
240 rank (analogous to "health selection" explanations for social gradients in humans). In this  
241 scenario, up-regulation of innate immune defense genes and an increased ability to fight off  
242 infection could be an indicator of male quality that is causal to attainment of high status (19, 35).

243 To differentiate between these hypotheses, we took advantage of the extensive behavioral  
244 data available for our study subjects and the ability to use genotype as instrumental variables in  
245 Mendelian randomization analysis (37). We reasoned that, if social status-associated gene  
246 expression profiles are a *consequence* of male rank, rank effects on gene expression should be  
247 mediated by rank-associated behaviors (as they are in experimental studies of rhesus macaques  
248 (14)). In particular, high-ranking males in our sample expend more energy in mate guarding and  
249 physical competition, and thus initiate more agonistic behavior towards other adult males ( $\rho=-$   
250 0.403,  $p=0.012$ ; Figure 4). In contrast, low-ranking males are more often targets of agonistic  
251 behavior from other adult males ( $\rho=0.704$ ,  $p=8.15 \times 10^{-7}$ ; Figure 4), increasing their exposure to  
252 social subordination-induced stress (36, 44). However, we found no evidence that rates of either  
253 received or initiated agonisms with other adult males explained the relationship between male  
254 dominance rank and gene expression (Figure 4). Of the 2277 male rank-associated genes tested,  
255 only 0.395 % and 0.263% were significantly mediated by initiated or received harassment,  
256 respectively, and rank effects were very similar whether we excluded or included these candidate  
257 mediators (agonisms initiated:  $R^2=0.649$ ,  $p<10^{-10}$ ; agonisms received:  $R^2=0.916$ ,  $p<10^{-10}$ ). These  
258 results suggest that rank-driven differences in agonistic behavior do not cause rank-associated  
259 variation in immune gene expression.

260 Alternatively, if high status-associated gene expression signatures *precede* attainment of  
261 high rank (i.e., are characteristic of high-quality males in good condition), males with genotypes

262 that predispose them towards high expression of innate immune genes should also tend to be  
263 high ranking. If so, genetic variation should predict both gene expression and, via a path through  
264 gene expression, male dominance rank; Figure 5). This prediction can be tested using Mendelian  
265 randomization (MR), a form of instrumental variable analysis. An instrumental variable is a  
266 variable that randomly distributes an intermediate variable across study subjects, and therefore  
267 mimics case/control assignment in a randomized clinical study. In MR, the instrumental variable  
268 is always genotype, and the intermediate variable is often a molecular trait (in our case, gene  
269 expression) that is both strongly predicted by genetic variation and is hypothesized to be causal  
270 to the outcome variable of interest (in our case, dominance rank). (37, 45). For our analyses, we  
271 used projections onto the second principal component of gene expression in males as the  
272 intermediate variable, because this composite measure captures much of the dominance rank  
273 effect on gene expression (Figure 1;  $\rho=0.44$ ,  $p=1.26 \times 10^{-4}$ ). Further, genes that load heavily on  
274 PC2 are highly enriched for genes involved in GO categories such as ‘positive regulation of  
275 inflammatory response’, ‘TLR4 signaling pathway’, and ‘defense response to Gram-positive  
276 bacterium’ (Table S7 and Figure 5). These observations indicate that PC2 can be treated as an  
277 intermediate variable for MR analysis that captures not only rank-associated variation in gene  
278 expression, but specifically rank-associated variation in innate immune defense genes.

279         Using the MR framework, we compared baboon males genetically randomized into a  
280 high expression class to males genetically randomized into a low expression class to evaluate the  
281 effect of immune gene expression (captured by PC2) on male dominance rank. Importantly, this  
282 approach does not imply a causal relationship between genotype and dominance rank itself;  
283 indeed, the lack of such a relationship is a requirement for MR (Figure 5; see SI Materials and  
284 Methods). To implement MR, we first identified 99,760 single nucleotide polymorphisms

285 (SNPs) that segregated in our study population, 29,212 of which had a minor allele frequency  
286 (MAF)>5% and were not in strong linkage disequilibrium ( $r^2>0.5$ ) with other nearby (<10 kb)  
287 candidate SNPs. A subset of these variants (n=20 SNPs) satisfied stringent criteria as valid  
288 instruments for MR analysis (see Methods; Figure S9).

289 Genotype values at all 20 SNPs were strongly associated with PC2 (FDR<5%) and, via  
290 their effects on PC2, with dominance rank (mean PVE for the correlation between a given SNP  
291 and PC2 ( $\pm$  SD) =  $27.28 \pm 6.64\%$ ). Specifically, genotypes that predisposed individuals toward  
292 low PC2 gene expression values (which is associated with high social status; Figure 1), also  
293 consistently predicted high dominance rank (MR Egger method:  $\beta=1.2284$ ,  $p=454 \times 10^{-3}$ ;  
294 Figure 5). Genotype at these SNPs does not explain variation in dominance rank independently  
295 of PC2 (all  $p>0.05$ ; see Methods) and cannot be reverse-causally altered by dominance rank or  
296 gene expression. Thus, our analysis supports the hypothesis that the immune gene expression  
297 signature of rank precedes rank attainment. Importantly, our results are robust to the effects of  
298 outlier instruments and the potential confounding effects of genetic admixture, population  
299 genetic structure, and body size (SI Materials and Methods). Further, when we applied MR  
300 analysis to data from captive female macaques (14), in which social status is experimentally  
301 imposed, we found no support for status-associated gene expression differences as a precursor to  
302 rank, as expected (Figure S10, SI Materials and Methods).

303

## 304 **DISCUSSION**

305 An increasingly large body of research shows that social status is reflected in patterns of  
306 gene regulation (10, 11, 14, 46). Our results reinforce this observation by revealing, for the first  
307 time, a strong link between dominance rank and gene expression in a natural mammal

308 population. Despite substantial interest in the relative contribution of genetic, environmental, and  
309 demographic effects to gene expression (47), social environmental variation is rarely considered.  
310 Our results combine with those of previous studies to suggest that its omission ignores a major  
311 source of variance—one that is perhaps unsurprising in retrospect, given the centrality of social  
312 relationships to fitness outcomes in social species (2, 4).

313         However, our findings also stress that the social status-gene expression relationship is  
314 highly context-dependent. Previous work has emphasized the association between low social  
315 status and increased expression of innate immune and inflammation-related genes (16), but in  
316 our analyses, we observed no strong associations in females and a reversal of this pattern in  
317 males. This heterogeneity—between species, captive versus wild study systems, and sexes—  
318 points to a more nuanced relationship between social status and gene regulation than previously  
319 appreciated. Instead, it paints a picture consistent with decades of work on rank associations with  
320 other physiological outcomes, especially glucocorticoid levels. These studies emphasize that,  
321 because both the predictors and social implications of dominance rank vary across species,  
322 populations, and social contexts, so too will its physiological and fitness correlates (3, 18, 48).

323         One potential explanation for why we identified few rank-associated genes in female  
324 baboons, despite clear rank effects on gene expression in captive female rhesus macaques (14),  
325 involves differences in the opportunity for social support. Low social status has been most  
326 strongly linked to pro-inflammatory gene expression signatures in societies where low status  
327 individuals experience chronic social stress and elevated glucocorticoid levels (10, 16). This  
328 situation typically occurs when rank hierarchies are aggressively enforced, and low-ranking  
329 animals have little social support (3, 18, 42). The first condition (strict hierarchy enforcement)  
330 holds for both captive rhesus macaque and wild baboon females, but the second condition

331 (absence of social support, which for females of both species is usually derived from kin),  
332 differs. In studies designed to test the causal effects of social status, captive rhesus macaque  
333 females are typically housed in groups without close kin, which breaks up the correlation  
334 between relatedness and dominance rank (49). In contrast, our study subjects were sampled from  
335 natural social groups in which females typically co-reside with their maternal relatives. Thus,  
336 low-ranking baboon females often have the opportunity to buffer themselves against status-  
337 associated stressors by investing in social bonds with kin, while captive macaque females do not.  
338 Indeed, in the same baboon population studied here, rank does not predict female lifespan  
339 independently of its effect on social integration (50). These observations suggest the importance  
340 of future studies on the molecular signatures of social integration in females, including the  
341 potential for social status-social integration interactions.

342 In contrast to females, we observed a strong signature of dominance rank in samples  
343 collected from male baboons. However, we found that high status males tended to upregulate  
344 inflammation and immune defense-related genes, contrary to findings in humans and captive  
345 female macaques that have reported the opposite pattern (11, 14). Further, instead of social status  
346 driving variation in gene expression, our MR analysis suggests that males who compete  
347 successfully for high rank are already non-random with respect to immune gene expression.  
348 Several explanations could account for this result. First, the ability to maintain an energetically  
349 costly pro-inflammatory state could be an indicator of male condition. In Amboseli, high ranking  
350 male baboons exhibit high testosterone levels, and alpha males also exhibit high glucocorticoid  
351 levels (36). Given that glucocorticoids, and perhaps testosterone, can suppress some immune  
352 responses, males that can maintain active innate immune defense systems in the face of these  
353 hormone signals may be particularly high quality (51, 52). Notably, male baboons in Amboseli



354 also exhibit graded increases in glucocorticoid levels with decreasing social status and some  
355 evidence for glucocorticoid resistance (36, 44). Our observation that inflammation-related gene  
356 expression is nevertheless higher in high-ranking males thus suggests that glucocorticoid and  
357 immunological correlates of rank can be decoupled, perhaps as a function of male condition.

358         A non-mutually exclusive explanation is that individuals that mount strong innate  
359 immune defenses are more likely to succeed in, and recover from, physical conflicts with  
360 conspecifics. Indeed, at any given time after injury, the highest ranking males in Amboseli are  
361 three times more likely to heal from wounds and injuries than low ranking males (35).  
362 Upregulation of genes involved in the inflammatory response, which facilitates pathogen defense  
363 and recovery from tissue damage, may explain this observation. Males who can maintain high  
364 expression of inflammation-related genes may therefore enjoy an adaptive advantage in the  
365 fights required to attain and maintain high status. Such an explanation does not exclude the  
366 possibility that a persistent pro-inflammatory state is also costly, consistent with its role in aging  
367 and susceptibility to disease (17). However, because dominance rank is the best predictor of  
368 reproductive success in male baboons (23), even physiological states that incur long-term costs  
369 will be selectively advantageous if they aid in competition for high rank. Previous hypotheses  
370 have predicted higher investment in inflammatory defenses for low ranking males than high  
371 ranking males (53, 54), an argument that has received mixed support in empirical studies (19).  
372 Our results directly oppose this idea and suggest that the relationship between inflammation and  
373 social status is highly context-dependent.

374         Finally, our study highlights a simple functional genomic approach for investigating how  
375 the social environment and other individual characteristics covary with immune function in  
376 natural populations. *Ex vivo* challenge experiments like the one conducted here can be used to

377 measure physiological sensitivity to predictors of interest, test hypotheses about trade-offs in  
378 investment, and identify candidate molecular mechanisms that link the environment to health or  
379 fitness-related outcomes. In addition, because gene regulatory phenotypes are far more amenable  
380 to trait mapping approaches than organism-level traits, they can be integrated with Mendelian  
381 randomization to investigate the causal direction linking gene regulatory phenotypes to other  
382 traits. This approach is increasingly used in humans when experimental randomization is not  
383 possible (37, 45), but has not been applied in observational studies of other species, which are  
384 often confronted with the same limitations.

385

## 386 **METHODS**

387 We obtained blood samples from 61 adult baboons using previously described procedures  
388 (55). All animals were individually recognized members of a long-term study population that has  
389 been monitored by the Amboseli Baboon Research Project (ABRP) for almost five decades (34).  
390 From each animal, we collected: (i) whole blood used to isolate peripheral blood mononuclear  
391 cells (PBMCs) for flow cytometry analysis and (ii) 1 mL of whole blood in each of two  
392 TruCulture tubes (LPS or NULL), which were subsequently incubated for 10 hours at 37°C and  
393 used to isolate leukocytes (for mRNA-seq) and serum (for cytokine profiling). Dominance  
394 hierarchies were constructed monthly for every social group in the study population based on the  
395 outcomes of dyadic aggressive encounters. Ordinal dominance ranks were assigned to every  
396 adult based on these hierarchies, such that low numbers signify high rank/social status and high  
397 numbers signify low rank/social status (28).

398 mRNA-seq data were mapped to the anubis baboon genome (*Panu 2.0*). The resulting  
399 counts were filtered to remove lowly expressed genes and normalized to remove batch and cell

400 type composition effects. To identify social status-associated gene expression variation, we used  
401 principal components analysis to investigate rank associations with the major axes of variation in  
402 the full gene expression dataset and linear mixed-effects models to test for rank associations at  
403 each gene. In the mixed models, we nested rank within sex and included age (nested within sex)  
404 and condition (NULL or LPS) as fixed effects covariates. A relatedness matrix inferred from  
405 SNP genotypes was included to control for genetic relatedness among our study subjects.

406 To ask whether status-associated behaviors in males explained observed relationships  
407 between dominance rank and gene expression, we used long-term behavioral data on agonism  
408 rates in formal mediation analyses. Specifically, we compared the estimate of the rank effect on  
409 each gene in a model that included versus excluded the mediator (agonisms initiated or agonisms  
410 received), and used bootstrap resampling to assess significance. To ask whether variation in gene  
411 expression precedes variation in dominance rank, we used Mendelian randomization (MR), a  
412 form of instrumental variable analysis (37). To conduct MR, we combined the pipeline and  
413 filtering criteria outlined in Figure S9 with the MR Egger method (56) implemented in the R  
414 package ‘MendelianRandomization’ (57).

415 All statistical analyses were performed in R (58). Further details for all experimental and  
416 statistical procedures can be found in the SI Materials and Methods. Data included in this study  
417 were obtained in accordance with Institutional Animal Care and Use Committee protocols  
418 approved by Duke University (IACUC A004-15-01).

419

## 420 **ACKNOWLEDGMENTS**

421 We gratefully acknowledge the National Science Foundation and the National Institutes  
422 of Health for their support, currently through NSF IOS 1456832, NIH R01AG053330,

423 R01HD088558, and P01AG031719. This work was also supported by the Leakey Foundation,  
424 BCS-1455808, and R21-AG049936. We thank members of the Amboseli Baboon Project,  
425 especially J. Altmann for her foundational role in establishing these data sets; R.S. Mututua, S.  
426 Sayialel, J.K. Warutere, T. Wango, and V. Oudu in Kenya; N. Learn, J. Gordon, and K. Pinc for  
427 expert database management and design; and T. Voyles and C. Del Carpio for assistance with  
428 wet lab work. Thanks to N. Snyder-Mackler, J. Anderson, X. Zhou, L. Barreiro, S. Mukherjee,  
429 and J. Sanz for support on data analysis and feedback on the manuscript. Finally, we thank the  
430 Baylor College of Medicine Human Genome Sequencing Center for access to the baboon  
431 genome assembly (*Panu 2.0*). For a complete set of acknowledgments, please visit  
432 <http://amboselibaboons.nd.edu/acknowledgements/>.

433

#### 434 **AUTHOR CONTRIBUTIONS**

435 AJL, JT, and EAA designed research; SCA, EAA, and JT contributed long-term data;  
436 AJL, MYA, RN, PM, and FN performed research; TK contributed research/analytic tools; AJL  
437 analyzed data; and AJL, EAA, and JT wrote the paper, with contributions from all co-authors.

438

#### 439 **CONFLICT OF INTEREST**

440 The authors declare no conflict of interest.

**Figure 1. Study design.** (A) Whole blood was drawn into tubes containing cell culture media alone (NULL) or media + lipopolysaccharide (LPS). Post-incubation, leukocytes were isolated for RNA-seq and serum was isolated for cytokine profiling to confirm the expected immune response. PBMCs were isolated in parallel to assess cell type composition via flow cytometry. Proinflammatory cytokines were consistently upregulated in the LPS condition at the (B) mRNA and (C) protein level (all  $p < 10^{-10}$ ).

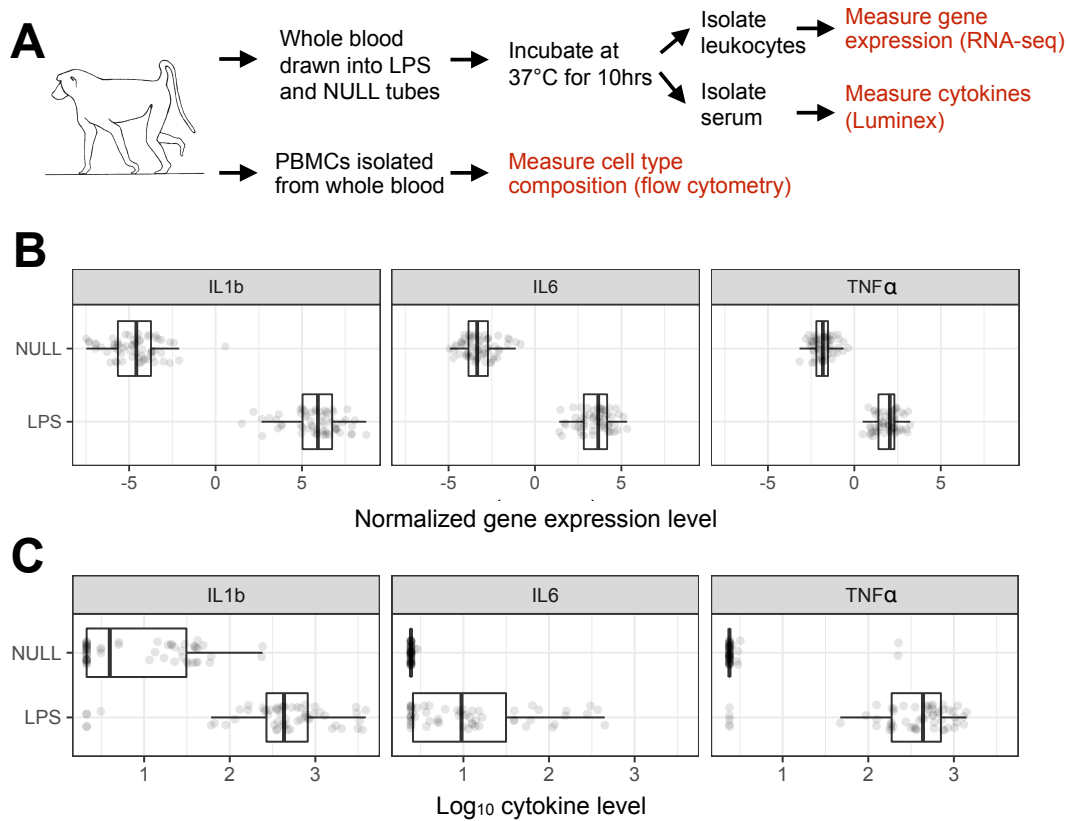

**Figure 2. Sex-specific associations between dominance rank and gene expression.** (A) PCA decomposition of LPS and NULL condition samples reveals that both treatment and dominance rank have strong effects on gene expression in males. (B) In females, treatment, but not dominance rank, affects global gene expression profiles. Legend to the right of panel B applies to both panels A and B. PC2 is correlated with rank in (C) males but not (D) females (males:  $\rho=0.44$ ,  $p=1.26 \times 10^{-4}$ ; females:  $\rho=-0.11$ ,  $p=0.42$ ). (E) Example of an immune gene (*IL17*) for which rank has a strong effect in males but not females (males:  $\rho=-0.48$ ,  $p=2.13 \times 10^{-5}$ ; females:  $\rho=0.12$ ,  $p=0.39$ ). In C-E, low values on the x axis signify high status and high values signify low status.

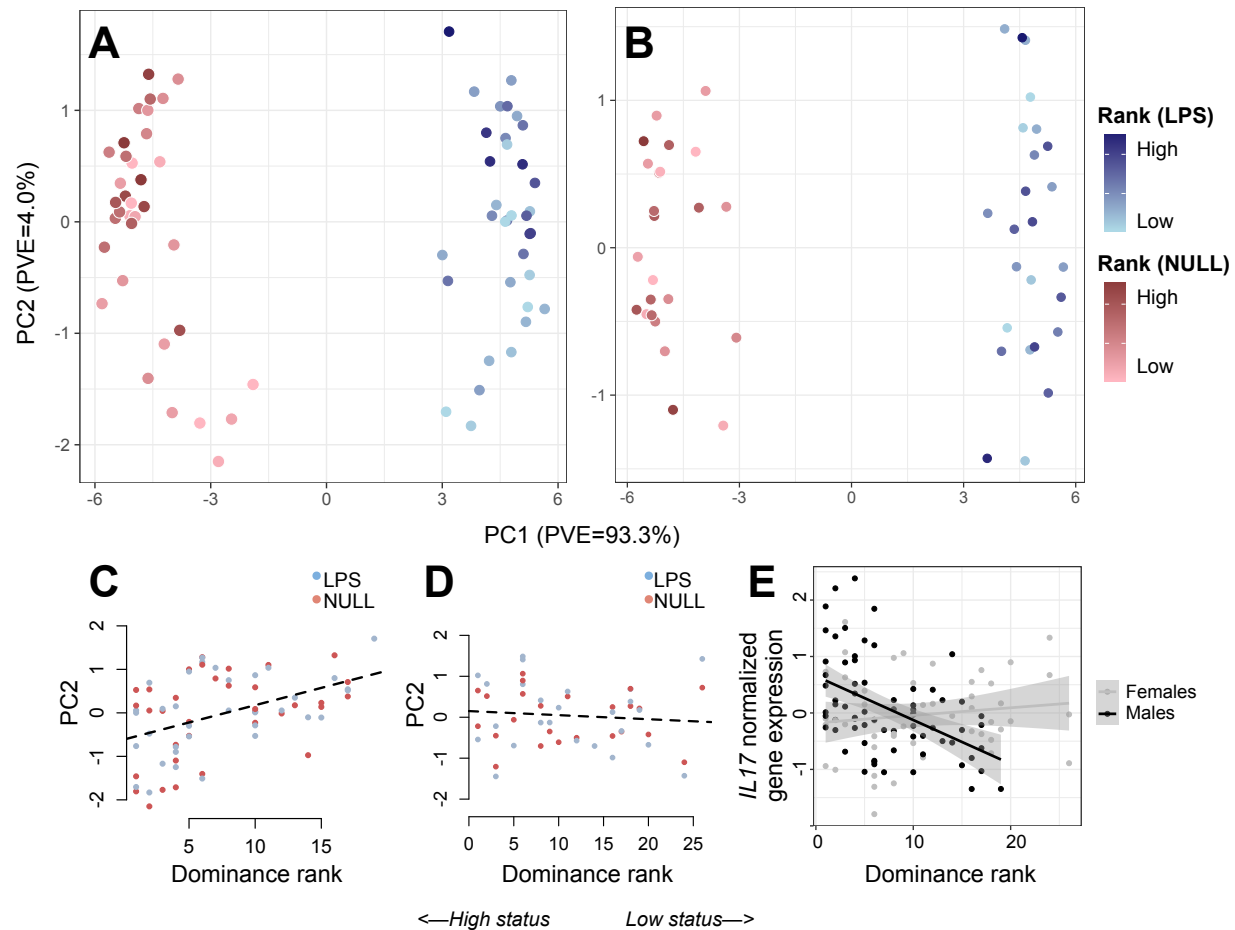

**Figure 3. High social status in males is associated with up-regulation of innate immune genes.** (A) Gene ontology (GO) term enrichment for genes that were up-regulated in high status males relative to low status males (see also Figure S4 and Tables S4-5). Inclusion is conditional on significant up-regulation by LPS. (B) X-axis: effect of rank on gene expression previously reported for captive female rhesus macaques (1), for leukocytes incubated in the presence of LPS. Y-axis: parallel results from wild male baboons. Effect sizes are plotted for genes that were found to be significantly rank-associated in both data sets and sign-reversed for the macaque data set for easier comparison to the baboon data set. (C) Simplified schematic of the LPS-induced TLR4 signaling pathway. LPS can activate a MyD88-dependent or TRIF-dependent response, leading to downstream gene regulatory responses coordinated by NF $\kappa$ B, IRF3, and other transcription factors. (D) Rank-associated genes that are up-regulated in the LPS condition via the MyD88 pathway (“MyD88-dependent”) are biased towards higher expression in high-status males. In contrast, the background set of all rank-associated genes (Wilcoxon rank sum test:  $p=5.36 \times 10^{-12}$ ), as well as the set of rank-associated, TRIF-dependent genes ( $p=5.34 \times 10^{-3}$ ), show no directional bias. (E) Male dominance rank predicts median gene expression levels across MyD88-dependent genes ( $\rho=-0.414$ ,  $p=0.012$ ), but not across TRIF-dependent genes ( $\rho=-0.133$ ,  $p=0.441$ ). Each dot represents the median normalized expression level (LPS condition) for a male in the data set, plotted separately for MyD88-dependent (blue) and TRIF-dependent genes (orange).

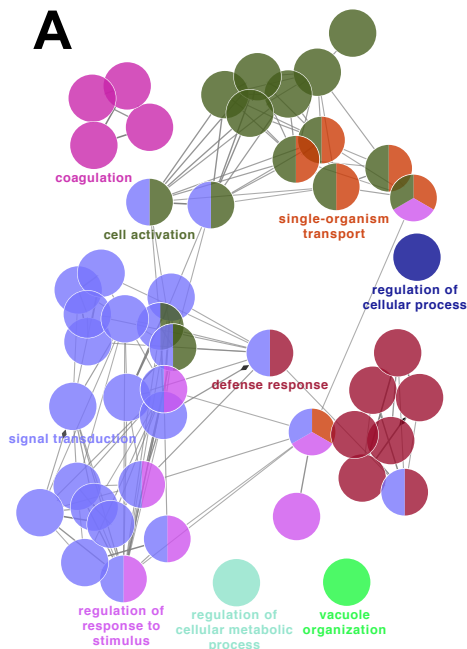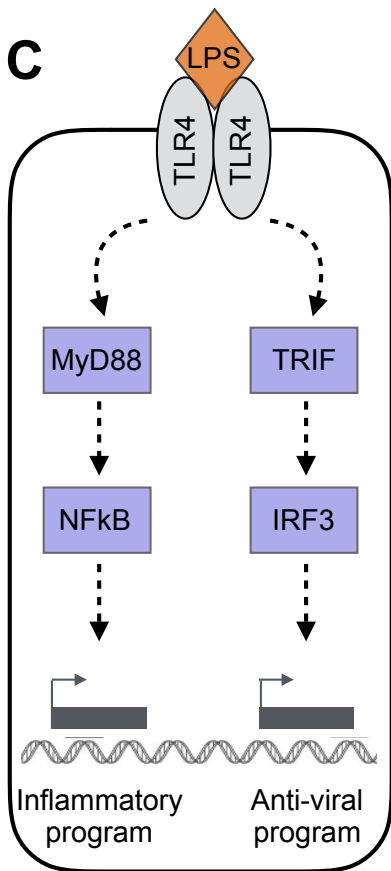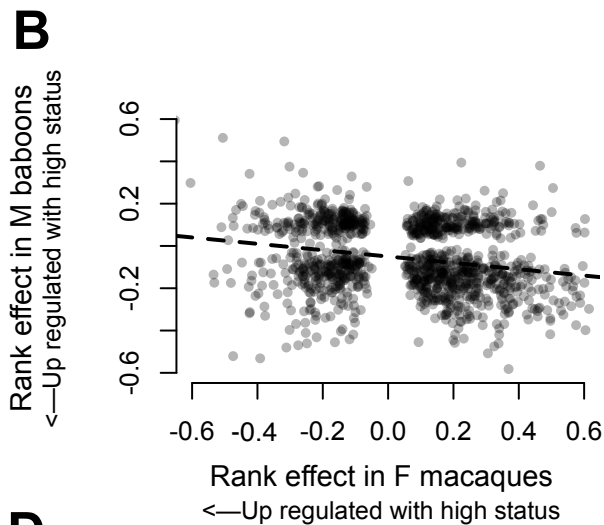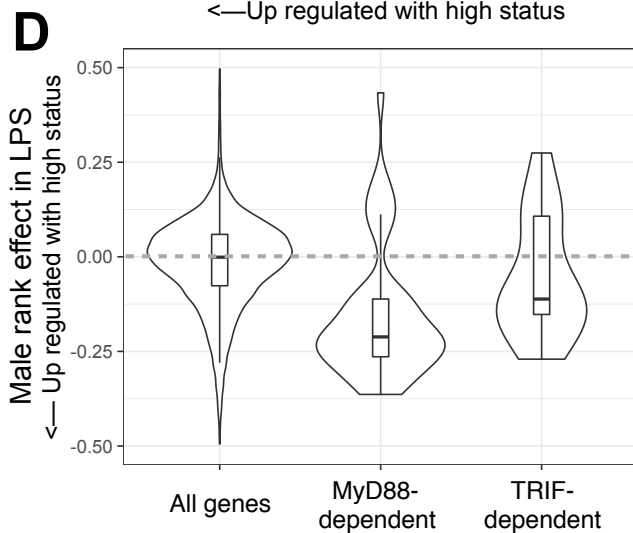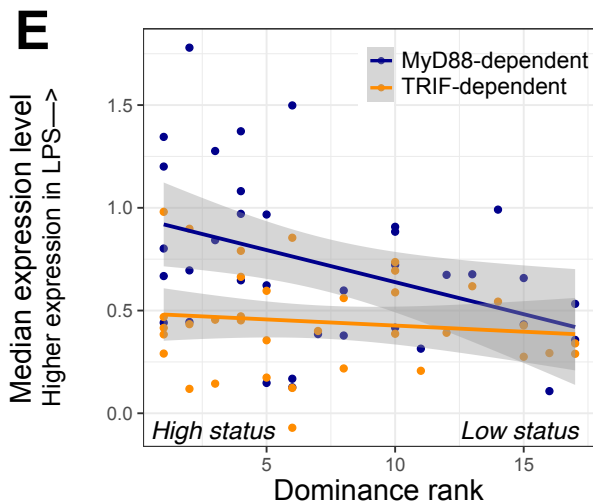



**Figure 4. Social status-gene expression associations in males are not explained by dominance rank-associated agonistic behavior.** (A) High-ranking animals in our dataset initiate more agonisms than low ranking animals (Spearman's rank correlation,  $\rho=-0.403$ ,  $p=0.012$ ), and (B) low-ranking animals receive more agonisms ( $\rho=0.704$ ,  $p=8.15 \times 10^{-7}$ ). Y-axis represents a normalized measure of agonism rate corrected for observer effort. We tested the hypothesis presented in (C). However, we found that neither (D) agonisms initiated nor (E) received explain the relationship between male dominance rank and gene expression. Each point represents the estimate of the rank effect in the presence (x-axis) or absence (y-axis) of the putative mediating variable ( $\rho=0.953$  and  $0.964$  in panels C and D, respectively; both  $p < 10^{-10}$ ). Of the 2277 rank-associated genes tested, only 0.26% and 0.39% (shown as red dots) were significantly mediated by initiated and received harassment, respectively. Dashed line shows the  $x=y$  line.

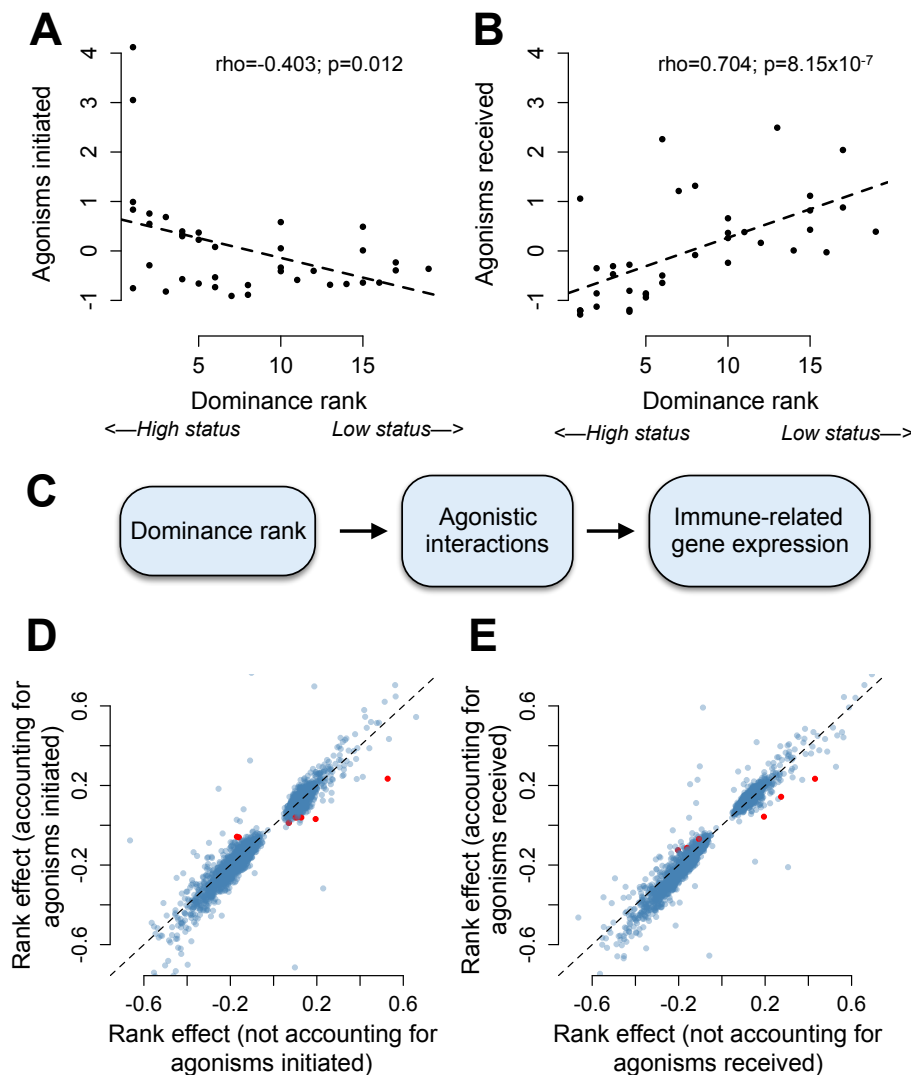

**Figure 5. Changes in gene expression precede social status attainment in male baboons.** (A) Mendelian randomization can be used to test the hypothesis, highlighted with a red arrow, that PC2 of gene expression variation (treated here as a measure of quality or condition) is causal to dominance rank. This test is robust provided that the following assumptions are met: (i) SNP genotype (the instrument) is a strong predictor of gene expression PC2, (ii) SNP genotype has no association with dominance rank except through its effects on gene expression, and (iii) SNP genotype is not related to confounding factors. (B) and (C) show that assumption (i) is satisfied. We see no detectable SNP-rank relationship for these variants independent of PC2, satisfying assumption (ii). (B) Genes that load highly on PC2 tend to be involved in innate immune signaling pathways. X-axis represents the mean PC2 loading for genes in the GO category represented on the y-axis. Blue points = observed data; grey boxplots = mean loadings for each GO category after randomizing genes across categories (while maintaining the same number of genes in each category). (C) Manhattan plot showing the strength of the association ( $-\log_{10}$  p-value) between SNP genotype and PC2 for all SNPs tested ( $n=29,212$  candidate SNPs). Green points = SNPs that passed all filtering criteria and were used as instruments in MR analyses. Red line = genome-wide significance cutoff (5% FDR) (2). (D) Intuitively, if gene expression is causal to dominance rank, individuals with genotypes that predispose them toward low PC2 gene expression values should tend to also be high ranking (low PC2 values are associated with high social status; Figure 1). Consistent with this idea, effect sizes for the SNP-PC2 relationship consistently predict effect sizes for the SNP-dominance rank relationship (MR Egger method:  $\beta=1.2284$ ,  $p=454 \times 10^{-3}$ ).

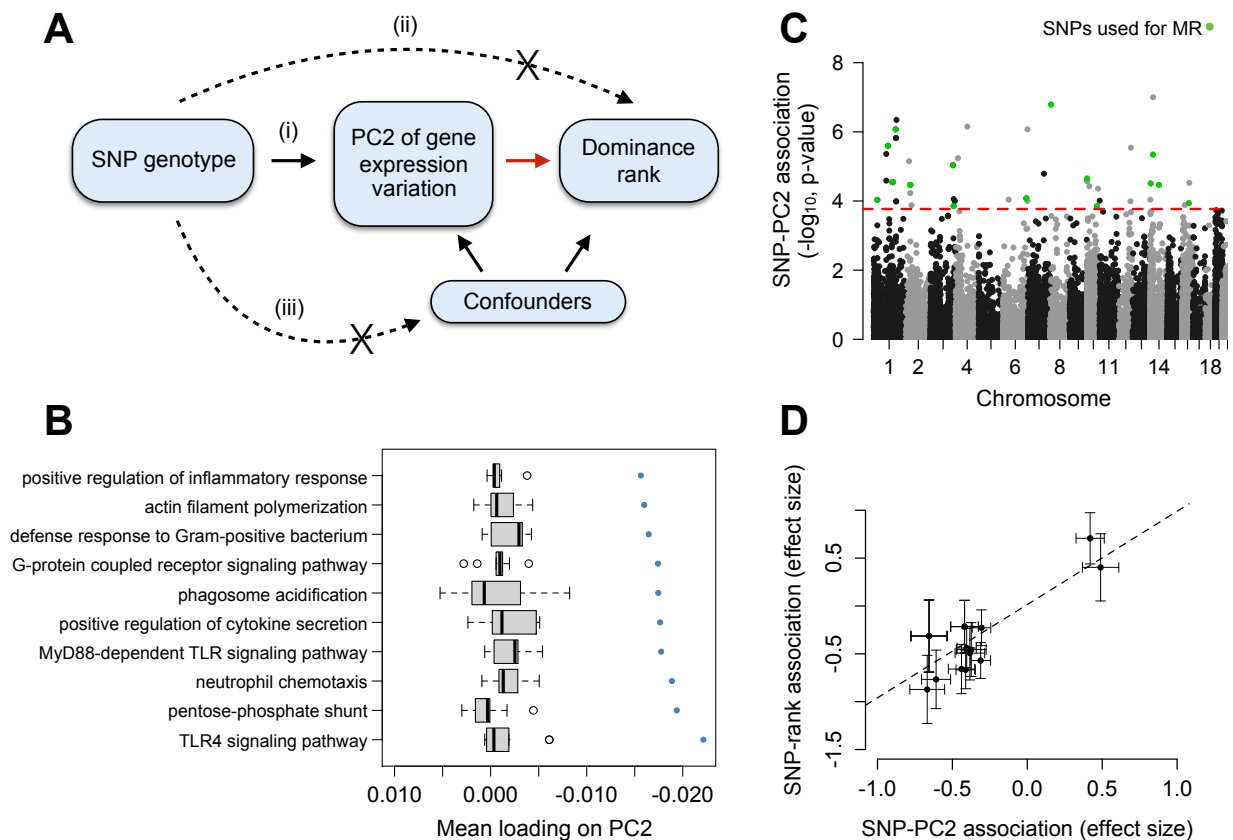

441 **REFERENCES**

- 442 1. Habig B, Doellman MM, Woods K, Olansen J, Archie EA (2018) Social status and  
443 parasitism in male and female vertebrates: a meta-analysis. *Sci Rep* 8:3629.
- 444 2. Sapolsky RM (2004) Social Status and Health in Humans and Other Animals. *Annu Rev*  
445 *Anthropol* 33:393–418.
- 446 3. Creel S (2001) Social dominance and stress hormones. *Trends Ecol Evol* 16:491–497.
- 447 4. Sapolsky RM (2005) The influence of social hierarchy on primate health. *Science*  
448 308:648–52.
- 449 5. Marmot M (2005) *The Status Syndrome: How Social Standing Affects Our Health and*  
450 *Longevity* (Owl Books, New York, NY).
- 451 6. Chetty R et al. (2016) The Association Between Income and Life Expectancy in the  
452 United States, 2001-2014. *J Am Med Assoc* 315:1750.
- 453 7. Roskam AR, Sc M, Schaap MM, Sc M (2008) Socioeconomic Inequalities in Health in 22  
454 European Countries. *N Engl J Med* 358:2468–81.
- 455 8. Marmot M (2005) Public Health Social determinants of health inequalities. 365:1099–  
456 1104.
- 457 9. Taylor SE, Repetti RL, Seeman T (1997) Health psychology: what is an unhealthy  
458 environment and how does it get under the skin? *Annu Rev Psychol* 48:411–47.
- 459 10. Tung J, Gilad Y (2013) Social environmental effects on gene regulation. *Cell Mol life Sci*  
460 70:4323–39.
- 461 11. Cole SW (2014) Human Social Genomics. *PLoS Genet* 10:e1004601.
- 462 12. Bondar N et al. (2017) Molecular Adaptations to Social Defeat Stress and Induced  
463 Depression in Mice. *Mol Neurobiol* 55:3394–3407.

- 464 13. Sabeti PC et al. (2007) Genome-wide detection and characterization of positive selection  
465 in human populations. *Nature* 449:913–8.
- 466 14. Snyder-Mackler N et al. (2016) Social status alters immune regulation and response to  
467 infection. *Science* 354:1041–1045.
- 468 15. Tung J et al. (2012) Social environment is associated with gene regulatory variation in the  
469 rhesus macaque immune system. *Proc Natl Acad Sci* 109:6490–5.
- 470 16. Slavich GM, Cole SW (2013) The Emerging Field of Human Social Genomics. *Clin*  
471 *Psychol Sci* 1:331–348.
- 472 17. López-Otín C, Blasco MA, Partridge L, Serrano M, Kroemer G (2013) The hallmarks of  
473 aging. *Cell* 153.
- 474 18. Abbott D. et al. (2003) Are subordinates always stressed? a comparative analysis of rank  
475 differences in cortisol levels among primates. *Horm Behav* 43:67–82.
- 476 19. Habig B, Archie EA, Habig B (2015) Social status, immune response and parasitism in  
477 males : a meta-analysis.
- 478 20. Shively CA, Wilson ME (2016) *Social Inequalities in Health in Nonhuman Primates*  
479 (Springer, New York, NY).
- 480 21. Thierry B, Iwaniuk AN, Pellis SM (2000) The influence of phylogeny on the social  
481 behaviour of macaques (Primates: Cercopithecidae, genus *Macaca*). *Ethology* 106:713–  
482 728.
- 483 22. Wilson ME (2016) *An Introduction to the Female Macaque Model of Social*  
484 *Subordination Stress* eds Shively CA, Day SM.
- 485 23. Alberts SC, Watts HE, Altmann J (2003) Queuing and queue-jumping: long-term patterns  
486 of reproductive skew in male savannah baboons, *Papio cynocephalus*. *Anim Behav*

- 487 65:821–840.
- 488 24. Clutton-Brock TH, Guinness F, Albon S (1982) *Red Deer: Behaviour and Ecology of*  
489 *Two Sexes* (University of Chicago Press, Chicago, IL).
- 490 25. Archie E a., Morrison T a., Foley C a. H, Moss CJ, Alberts SC (2006) Dominance rank  
491 relationships among wild female African elephants, *Loxodonta africana*. *Anim Behav*  
492 71:117–127.
- 493 26. Langergraber KE (2012) in *Evolution of Primate Societies*, eds Mitani JC, Call J,  
494 Kappeler PM, Palombit RA, Silk JB (University of Chicago Press, Chicago, IL), pp 491–  
495 513.
- 496 27. Kawamura S (1958) The matriarchal social order in the Minoo-B troop-A study of the  
497 rank system of Japanese macaques. *Primates* 2:149–156.
- 498 28. Hausfater G, Altmann J, Altmann S (1982) Long-Term Consistency of Dominance  
499 Relations Among Female Baboons (*Papio cynocephalus*). *Science* 217:752–5.
- 500 29. Holekamp KE, Smale L (1991) Dominance Acquisition During Mammalian Social  
501 Development: The “Inheritance” of Maternal Rank. *Integr Comp Biol* 31:306–317.
- 502 30. Gurven M, von Rueden C (2006) Hunting, social status and biological fitness. *Soc Biol*  
503 53:81–99.
- 504 31. Wiessner P (1996) in *Food and the Status Quest*, eds Wiessner P, SCHIEFENHÖVEL W  
505 (Berghahn Books, Providence, Rhode Island).
- 506 32. Mealey L (1985) The relationship between social status and biological success: A case  
507 study of the Mormon religious hierarchy. *Ethol Sociobiol* 6:249–257.
- 508 33. Pettay JE, Helle S, Jokela J, Lummaa V (2007) Natural Selection on Female Life-History  
509 Traits in Relation to Socio-Economic Class in Pre-Industrial Human Populations. *PLoS*

- 510            *One* 2.
- 511    34.    Alberts SC, Altmann J (2012) in *Long-Term Field Studies of Primates*, eds Kappeler P,  
512            Watts DP (Springer, New York), pp 261–288.
- 513    35.    Archie E, Altmann J, Alberts SC (2012) Social status predicts wound healing in wild  
514            baboons. *Proc Natl Acad Sci* 109:9017–22.
- 515    36.    Gesquiere LR et al. (2011) Life at the top: rank and stress in wild male baboons. *Science*  
516            333:357–60.
- 517    37.    Smith GD, Ebrahim S (2003) “Mendelian randomization”: Can genetic epidemiology  
518            contribute to understanding environmental determinants of disease? *Int J Epidemiol* 32:1–  
519            22.
- 520    38.    Chen E, Miller GE, Kober MS, Cole SW (2011) Maternal warmth buffers the effects of  
521            low early-life socioeconomic status on pro-inflammatory signaling in adulthood. *Mol*  
522            *Psychiatry* 16:729–37.
- 523    39.    Cole SW et al. (2007) Social regulation of gene expression in human leukocytes. *Genome*  
524            *Biol* 8:R189.
- 525    40.    Miller GE et al. (2009) Low early-life social class leaves a biological residue manifested  
526            by decreased glucocorticoid and increased proinflammatory signaling. *Proc Natl Acad Sci*  
527            106:14716–21.
- 528    41.    Lu YC, Yeh WC, Ohashi PS (2008) LPS/TLR4 signal transduction pathway. *Cytokine*  
529            42:145–151.
- 530    42.    Cavigelli S, Chaudhry HS (2012) Social status, glucocorticoids, immune function, and  
531            health: Can animal studies help us understand human socioeconomic-status-related health  
532            disparities? *Horm Behav* 62:295–313.

- 533 43. Hausfater G, Watson D (1976) Social and reproductive correlates of parasite ova  
534 emissions by baboons. *Nature* 262:688–689.
- 535 44. Sapolsky R, Alberts S, Altmann J (1997) Hypercortisolism associated with social  
536 subordination or social isolation among wild baboons. *Arch Gen Psychiatry* 54:1137–  
537 1143.
- 538 45. Smith GD, Hemani G (2014) Mendelian randomization: Genetic anchors for causal  
539 inference in epidemiological studies. *Hum Mol Genet* 23:89–98.
- 540 46. Snyder-Mackler N et al. (2018) Social status alters chromatin accessibility and the gene  
541 regulatory response to glucocorticoid stimulation in rhesus macaques.  
542 *bioRxiv*:<http://dx.doi.org/10.1101/365049>.
- 543 47. Piasecka B et al. (2018) Distinctive roles of age, sex, and genetics in shaping  
544 transcriptional variation of human immune responses to microbial challenges. *Proc Natl*  
545 *Acad Sci* 115:E488–E497.
- 546 48. Goymann W, Wingfield JC (2004) Allostatic load, social status and stress hormones: The  
547 costs of social status matter. *Anim Behav* 67:591–602.
- 548 49. Snyder-Mackler N et al. (2016) Social status drives social relationships in groups of  
549 unrelated female rhesus macaques. *Anim Behav* 111:307–317.
- 550 50. Archie EA, Tung J, Clark M, Altmann J, Alberts SC (2014) Social affiliation matters:  
551 both same-sex and opposite-sex relationships predict survival in wild female baboons.  
552 *Proc R Soc London B Biol Sci* 281:20141261.
- 553 51. Duckworth RA, Mendonca MT, Hill GE (2001) A condition dependent link between  
554 testosterone and disease resistance in the house finch. *Proc R Soc B Biol Sci* 268:2467–  
555 2472.

- 556 52. Roberts ML, Buchanan KL, Hasselquist D, Evans MR (2007) Effects of testosterone and  
557 corticosterone on immunocompetence in the zebra finch. *Horm Behav* 51:126–134.
- 558 53. Dhabhar FS (2002) A Hassle a Day May Keep the Doctor Away: Stress and the  
559 Augmentation of Immune Function. *Integr Comp Biol* 42:556–564.
- 560 54. Lee KA (2006) Linking immune defenses and life history at the levels of the individual  
561 and the species. *Integr Comp Biol* 46:1000–1015.
- 562 55. Tung J et al. (2009) Evolution of a malaria resistance gene in wild primates. *Nature*  
563 460:388–91.
- 564 56. Bowden J, Smith GD, Burgess S (2015) Mendelian randomization with invalid  
565 instruments: Effect estimation and bias detection through Egger regression. *Int J*  
566 *Epidemiol* 44:512–525.
- 567 57. Yavorska OO, Burgess S (2017) MendelianRandomization: An R package for performing  
568 Mendelian randomization analyses using summarized data. *Int J Epidemiol* 46:1734–  
569 1739.
- 570 58. 'R Core Development Team' (2015) *R: A Language and Environment for Statistical*  
571 *Computing* (R Foundation for Statistical Computing, Vienna, Austria).
- 572
